# Supplementary material for: How do breastfeeding workplace interventions work?: a realist review
Source: Springer Nature journal article supplement (doi:10.1186/s12939-021-01490-7), 2021-06-25
Supplement: 12939_2021_1490_MOESM1_ESM.pdf [file 12939_2021_1490_MOESM1_ESM.pdf]

1 **APPENDIX I: SEARCH STRATEGIES**

2 Searches are provided for all the bibliographic databases. Date coverage/date searched and platforms  
 3 are listed. The multiline Ovid searches can be rerun at <https://tools.ovid.com/ovidtools/launcher.html>  
 4 by anyone with access to Medline and Global Health through Ovid. Please check whether any  
 5 unsupported characters or unintended line breaks have been introduced by the typesetting and copy-  
 6 pasting process.

7

| Ovid MEDLINE(R) ALL <1946 to October 01, 2020> |                                                                                                                                                                                                                                          |         |
|------------------------------------------------|------------------------------------------------------------------------------------------------------------------------------------------------------------------------------------------------------------------------------------------|---------|
| Line                                           | Query [comments in square brackets]                                                                                                                                                                                                      | Results |
| 1                                              | [Kathrin Litwan project]                                                                                                                                                                                                                 | 0       |
| 2                                              | [medline]                                                                                                                                                                                                                                | 0       |
| 3                                              | [breastfeeding concept]                                                                                                                                                                                                                  | 0       |
| 4                                              | exp breast feeding/                                                                                                                                                                                                                      | 38035   |
| 5                                              | (breastfe* or breast-fe*).mp.                                                                                                                                                                                                            | 58767   |
| 6                                              | lactation.mp.                                                                                                                                                                                                                            | 60214   |
| 7                                              | breast pump*.mp.                                                                                                                                                                                                                         | 389     |
| 8                                              | (express* adj2 milk).mp.                                                                                                                                                                                                                 | 1604    |
| 9                                              | [workplace context concept]                                                                                                                                                                                                              | 0       |
| 10                                             | workplace/                                                                                                                                                                                                                               | 23180   |
| 11                                             | Employment/ or work/ or "personnel staffing and scheduling"/                                                                                                                                                                             | 81730   |
| 12                                             | women, working/                                                                                                                                                                                                                          | 5375    |
| 13                                             | return to work/                                                                                                                                                                                                                          | 2629    |
| 14                                             | job satisfaction/                                                                                                                                                                                                                        | 25055   |
| 15                                             | work schedule tolerance/                                                                                                                                                                                                                 | 6918    |
| 16                                             | [tight focus on breastfeeding]                                                                                                                                                                                                           | 0       |
| 17                                             | 3 or 4 or 5 or 6 or 7 or 8                                                                                                                                                                                                               | 110302  |
| 18                                             | [for Covidence upload and screening, this is a set of papers with an explicit breastfeeding reference and EITHER workplace indexing OR *if* they haven't yet been indexed, some form of the word "work" in the title or author keywords] | 0       |
| 19                                             | 10 or 11 or 12 or 13 or 14 or 15                                                                                                                                                                                                         | 132080  |
| 20                                             | work*.ti,kf. not medline.st.                                                                                                                                                                                                             | 38425   |
| 21                                             | 17 and (19 or 20)                                                                                                                                                                                                                        | 1007    |
| Searched on October 2, 2020                    |                                                                                                                                                                                                                                          |         |

8

| Web of Science Core Collection                                                                                   |      |           |
|------------------------------------------------------------------------------------------------------------------|------|-----------|
| Indexes=SCI-EXPANDED, SSCI, A&HCI, CPCI-S, CPCI-SSH, BKCI-S, BKCI-SSH, ESCI, CCR-EXPANDED, IC Timespan=All years |      |           |
| 3                                                                                                                | 1107 | #1 AND #2 |

Appendix I – How do breastfeeding workplace interventions work?: a realist review

|   |        |                                                                                      |
|---|--------|--------------------------------------------------------------------------------------|
| 2 | 938256 | TI=(work*) OR AK=(work*) OR KP=(work*)                                               |
| 1 | 92705  | TS=(breastfe* or breast-fe* or lactation or breast-pump* or (express* NEAR/2 milk) ) |

Searched on November 4, 2020

1

| CINAHL (Ebsco) |                                                                                                                   |                                                                        |                                                                                                              |         |
|----------------|-------------------------------------------------------------------------------------------------------------------|------------------------------------------------------------------------|--------------------------------------------------------------------------------------------------------------|---------|
| #              | Query                                                                                                             | Limiters/Expanders                                                     | Last Run Via                                                                                                 | Results |
| S12            | S10 AND S11                                                                                                       | Expanders – Apply equivalent subjects<br>Search modes – Boolean/Phrase | Interface – EBSCOhost<br>Research Databases Search<br>Screen – Advanced Search<br>Database – CINAHL Complete | 1307    |
| S11            | S1 OR S2                                                                                                          | Expanders – Apply equivalent subjects<br>Search modes – Boolean/Phrase | Interface – EBSCOhost<br>Research Databases Search<br>Screen – Advanced Search<br>Database – CINAHL Complete | 33887   |
| S10            | S3 OR S4 OR S5 OR S6 OR S7 OR S8 OR S9                                                                            | Expanders – Apply equivalent subjects<br>Search modes – Boolean/Phrase | Interface – EBSCOhost<br>Research Databases Search<br>Screen – Advanced Search<br>Database – CINAHL Complete | 243486  |
| S9             | TI(work*)                                                                                                         | Expanders – Apply equivalent subjects<br>Search modes – Boolean/Phrase | Interface – EBSCOhost<br>Research Databases Search<br>Screen – Advanced Search<br>Database – CINAHL Complete | 144324  |
| S8             | (MH “Job Satisfaction”)                                                                                           | Expanders – Apply equivalent subjects<br>Search modes – Boolean/Phrase | Interface – EBSCOhost<br>Research Databases Search<br>Screen – Advanced Search<br>Database – CINAHL Complete | 21431   |
| S7             | (MH “Personnel Staffing and Scheduling”) OR (MH “Flexible Scheduling”) OR (MH “Shiftwork”) OR (MH “Job RE-Entry”) | Expanders – Apply equivalent subjects<br>Search modes – Boolean/Phrase | Interface – EBSCOhost<br>Research Databases Search<br>Screen – Advanced Search<br>Database – CINAHL Complete | 32759   |
| S6             | (MH “Women, Working+”)                                                                                            | Expanders – Apply equivalent subjects<br>Search modes – Boolean/Phrase | Interface – EBSCOhost<br>Research Databases Search<br>Screen – Advanced Search<br>Database – CINAHL Complete | 4496    |
| S5             | (MH “Work+”)                                                                                                      | Expanders – Apply equivalent subjects<br>Search modes – Boolean/Phrase | Interface – EBSCOhost<br>Research Databases Search<br>Screen – Advanced Search<br>Database – CINAHL Complete | 7459    |
| S4             | (MH “Employment+”)                                                                                                | Expanders – Apply equivalent subjects<br>Search modes – Boolean/Phrase | Interface – EBSCOhost<br>Research Databases Search<br>Screen – Advanced Search<br>Database – CINAHL Complete | 46122   |
| S3             | (MH “Work Environment+”) OR (MH “Job Accommodation”)                                                              | Expanders – Apply equivalent subjects<br>Search modes – Boolean/Phrase | Interface – EBSCOhost<br>Research Databases Search<br>Screen – Advanced Search<br>Database – CINAHL Complete | 34254   |

Appendix I – How do breastfeeding workplace interventions work?: a realist review

|                              |                                                                                                                                                                             |                               |                                                                                                              |       |
|------------------------------|-----------------------------------------------------------------------------------------------------------------------------------------------------------------------------|-------------------------------|--------------------------------------------------------------------------------------------------------------|-------|
| S2                           | (MH "Breast Feeding+")                                                                                                                                                      | Search modes – Boolean/Phrase | Interface – EBSCOhost<br>Research Databases Search<br>Screen – Advanced Search<br>Database – CINAHL Complete | 24024 |
| S1                           | TI(breastfe* or breast-fe* or lactation or breast-pump* or (express* NEAR/2 milk) ) OR AB (breastfe* or breast-fe* or lactation or breast-pump* or (express* NEAR/2 milk) ) | Search modes – Boolean/Phrase | Interface – EBSCOhost<br>Research Databases Search<br>Screen – Advanced Search<br>Database – CINAHL Complete | 26241 |
| Searched on November 4, 2020 |                                                                                                                                                                             |                               |                                                                                                              |       |

1

| Global Health <1910 to 2020 Week 42> |                                                                                      |         |
|--------------------------------------|--------------------------------------------------------------------------------------|---------|
| Line                                 | Query [comments in square brackets]                                                  | Results |
| 1                                    | [Kathrin Litwan project]                                                             | 0       |
| 2                                    | [global health]                                                                      | 0       |
| 3                                    | [breastfeeding concept]                                                              | 0       |
| 4                                    | exp breast feeding/ or breast pumps/ or preweaning period/                           | 22011   |
| 5                                    | (breastfe* or breast-fe* or lactation or breast pump* or (express* adj2 milk)).mp.   | 50693   |
| 6                                    | [workplace context concept]                                                          | 0       |
| 7                                    | work places/ or exp labour/ or exp work/ or exp workshops/ or exp work satisfaction/ | 15765   |
| 8                                    | exp employment/ or exp employed women/ or exp working life/                          | 4813    |
| 9                                    | working hours/                                                                       | 683     |
| 10                                   | work*.ti.                                                                            | 48220   |
| 11                                   | (4 or 5) and (7 or 8 or 9 or 10)                                                     | 779     |
| Searched on November 4, 2020         |                                                                                      |         |

2

| LILACS                                                                                                                                                            |            |
|-------------------------------------------------------------------------------------------------------------------------------------------------------------------|------------|
| ti:(work* OR employ*) AND tw:(breastfe* OR "breast fed" OR "breast feed" OR "breast feeding" OR lactation OR "breast pump" OR "breast pumps" OR "breast pumping") | 92 results |
| Search on November 18, 2020                                                                                                                                       |            |

3

| Global Index Medicus                                                                                                                                              |             |
|-------------------------------------------------------------------------------------------------------------------------------------------------------------------|-------------|
| ti:(work* OR employ*) AND tw:(breastfe* OR "breast fed" OR "breast feed" OR "breast feeding" OR lactation OR "breast pump" OR "breast pumps" OR "breast pumping") | 156 results |
| Search on November 18, 2020                                                                                                                                       |             |

4

5

Appendix I – How do breastfeeding workplace interventions work?: a realist review

| Business Source Complete      |                                                                                                                                           |                                                                                                                              |                                                                                                                    |         |
|-------------------------------|-------------------------------------------------------------------------------------------------------------------------------------------|------------------------------------------------------------------------------------------------------------------------------|--------------------------------------------------------------------------------------------------------------------|---------|
| #                             | Query                                                                                                                                     | Limiters/Expanders                                                                                                           | Last Run Via                                                                                                       | Results |
| S3                            | (S1 AND S2)                                                                                                                               | Expanders - Also search within the full text of the articles; Apply equivalent subjects<br><br>Search modes - Boolean/Phrase | Interface - EBSCOhost Research Databases Search<br>Screen - Advanced Search<br>Database - Business Source Complete | 307     |
| S2                            | TI ( work* or employ* ) OR SU ( work* or employ* OR industrial hygiene) OR KW ( work* or employ* )                                        | Expanders - Also search within the full text of the articles; Apply equivalent subjects<br><br>Search modes - Boolean/Phrase | Interface - EBSCOhost Research Databases Search<br>Screen - Advanced Search<br>Database - Business Source Complete | 1143114 |
| S1                            | TI ( breastfe* OR breast-fe* or lactation ) OR AB ( breastfe* OR breast-fe* or lactation ) OR KW ( breastfe* OR breast-fe* or lactation ) | Expanders - Also search within the full text of the articles; Apply equivalent subjects<br><br>Search modes - Boolean/Phrase | Interface - EBSCOhost Research Databases Search<br>Screen - Advanced Search<br>Database - Business Source Complete | 5168    |
| Searched on November 11, 2020 |                                                                                                                                           |                                                                                                                              |                                                                                                                    |         |

1

|                                                                                                                                                                       |  |  |  |  |
|-----------------------------------------------------------------------------------------------------------------------------------------------------------------------|--|--|--|--|
| ProQuest Dissertations & Theses Global                                                                                                                                |  |  |  |  |
| noft(breastfe* OR breast-fe* OR lactation OR breast-pump* OR (express* NEAR/2 milk)) AND (ti(work* OR employ* or job or jobs) OR su(work* OR employ* or job or jobs)) |  |  |  |  |
| 124 results                                                                                                                                                           |  |  |  |  |
| Searched on November 11, 2020                                                                                                                                         |  |  |  |  |

2

|                                                                                                                                                                                                      |  |  |  |  |
|------------------------------------------------------------------------------------------------------------------------------------------------------------------------------------------------------|--|--|--|--|
| Open Access Theses and Dissertations                                                                                                                                                                 |  |  |  |  |
| ((title:(work* OR employ*) OR subject:(work* OR employ*)) ) AND (breastfe* OR "breast fed" OR "breast feed" OR "breast feeding" OR lactation OR "breast pump" OR "breast pumps" OR "breast pumping") |  |  |  |  |

---

106 results

---

Searched on November 11, 2020

---
