# Supplementary material for: How do breastfeeding workplace interventions work?: a realist review
Source: Springer Nature journal article supplement (doi:10.1186/s12939-021-01490-7), 2021-06-25
Supplement: 12939_2021_1490_MOESM2_ESM.pdf [file 12939_2021_1490_MOESM2_ESM.pdf]

Appendix II – How do breastfeeding workplace interventions work?: a realist review

**APPENDIX 2: PUBLICATIONS NOT PUBLISHED IN ENGLISH, SPANISH, PORTUGUESE OR GERMAN. Workplace interventions to support breastfeeding realist review.**

| Title                                                                                           | Authors                                 | Year | Journal                                 | Volume(Issue):Pages | DOI                                                                                                       | Published language |
|-------------------------------------------------------------------------------------------------|-----------------------------------------|------|-----------------------------------------|---------------------|-----------------------------------------------------------------------------------------------------------|--------------------|
| Better conditions for nursing mothers in the labor market                                       | Anonymous                               | 1985 | Sygeplejersken                          | 85(19):12-13        | -                                                                                                         | Danish             |
| Effects of a breast feeding promotion program for working women                                 | Yoon, Ji-Won;<br>Park, Young-Joo        | 2008 | Journal of Korean Academy of Nursing    | 38(6): 843-852      | <a href="https://dx.doi.org/10.4040/jkan.2008.38.6.843">https://dx.doi.org/10.4040/jkan.2008.38.6.843</a> | Korean             |
| Fostering a breastfeeding-friendly workplace                                                    | Chen, Yi-Chun;<br>Kuo, Shu-Chen         | 2013 | Hu li za zhi The journal of nursing     | 60(1):17-22         | <a href="https://dx.doi.org/10.6224/JN.60.1.17">https://dx.doi.org/10.6224/JN.60.1.17</a>                 | Chinese            |
| Study on mothers return to work and supportive status of breastfeeding in workplace in Shanghai | Hu, QiaoZhen;<br>Jiang, Hong;<br>Li, Mu | 2013 | Maternal and Child Health Care of China | 28(11): 1778-1781   | -                                                                                                         | Chinese            |
